# Supplementary material for: A self-adaptive semiconductor–liquid junction for highly active and stable solar water splitting
Source: Royal Society of Chemistry journal article supplement (doi:10.1039/d2ta04914g), 2022-01-01
Supplement: d2ta04914g1.pdf [file d2ta04914g1.pdf]

## Supporting information for

### Self-adaptive semiconductor-liquid junction for highly active and stable solar water splitting

Huanhuan Sun <sup>a</sup>, Wei Hua <sup>a</sup>, Shiyu Liang <sup>a</sup>, Yueying Li <sup>\*b</sup>, Jian-Gan Wang <sup>\*a</sup>

<sup>a</sup> *State Key Laboratory of Solidification Processing, Center for Nano Energy Materials, School of Materials Science and Engineering, Northwestern Polytechnical University and Shaanxi Joint Lab of Graphene (NPU), No. 127, Youyi West Road, Xi'an 710072, China*

<sup>b</sup> *New Energy (Photovoltaic) Industry Research Center, Qinghai University, No. 251, Daning Road, Xining 810016, China*

**\*Corresponding Authors**

*E-mail addresses:* wangjiangan@nwpu.edu.cn (J.-G. Wang), liyy2019@qhu.edu.cn (Y. Li).

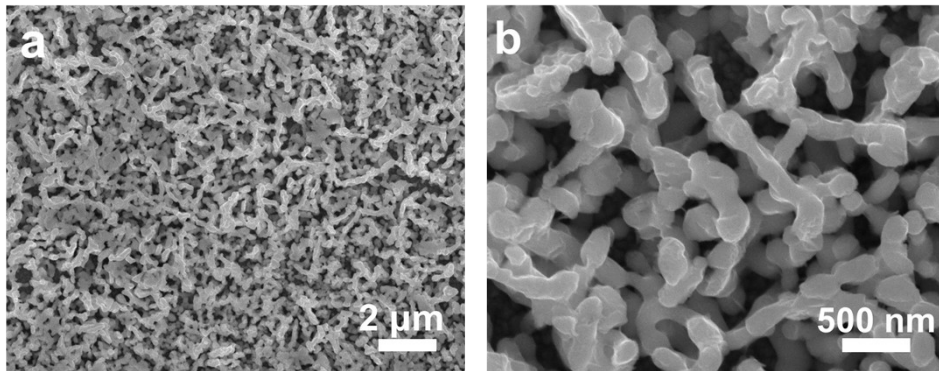

**Fig. S1** SEM image of the  $\text{BiVO}_4$  decorated by NiFe-TA complex.

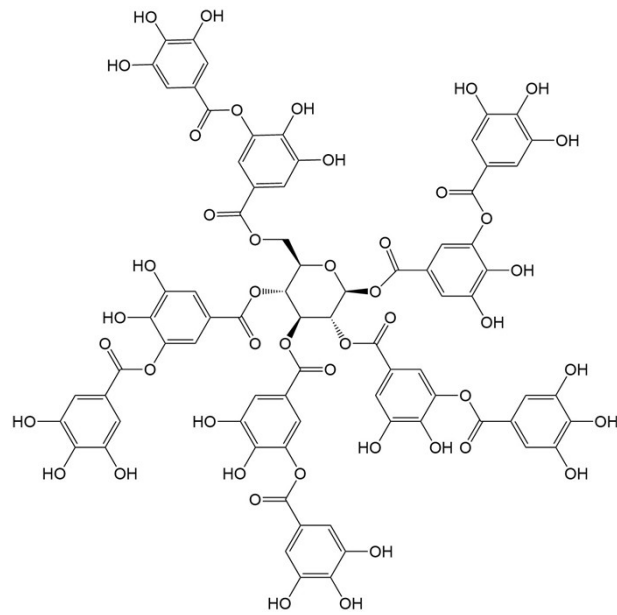

**Fig. S2** The constitutional formula of TA molecule.

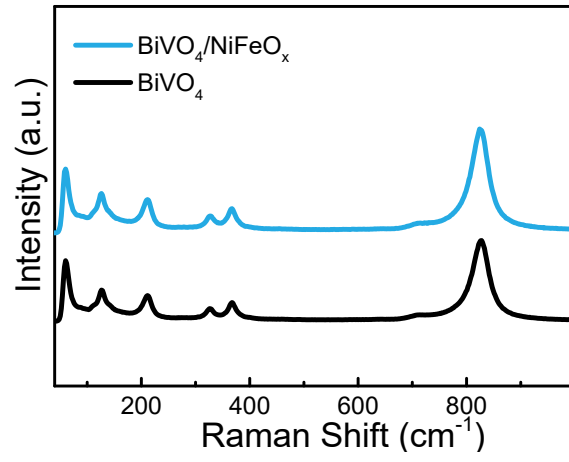

**Fig. S3** Raman shift of bare BiVO<sub>4</sub> and BiVO<sub>4</sub>/NiFeO<sub>x</sub> film.

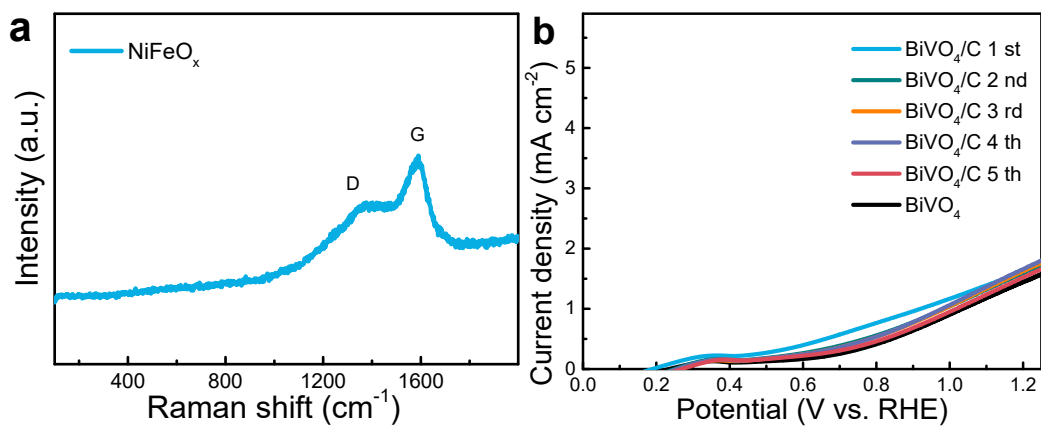

**Fig. S4** (a) Raman shift of the NiFeO<sub>x</sub> powder. (b) LSV curves of BiVO<sub>4</sub>/C photoanode.

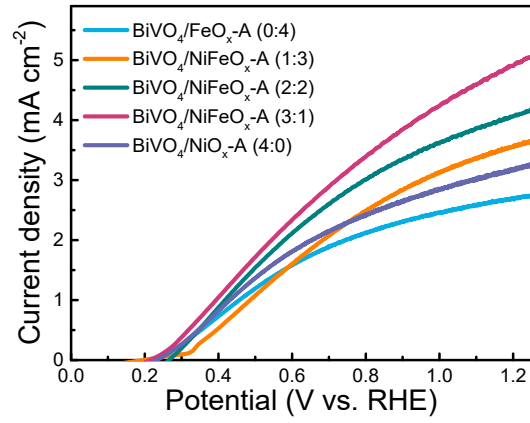

**Fig. S5** LSV curves of BiVO<sub>4</sub>/NiFeO<sub>x</sub> photoanode with different Ni/Fe ratio.

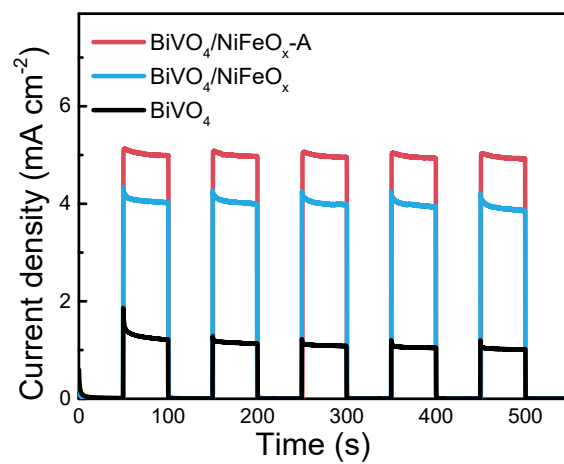

**Fig. S6** Chopped light current-time curves of BiVO<sub>4</sub>, BiVO<sub>4</sub>/NiFeO<sub>x</sub>, and BiVO<sub>4</sub>/NiFeO<sub>x</sub>-A at 1.23 V vs.RHE.

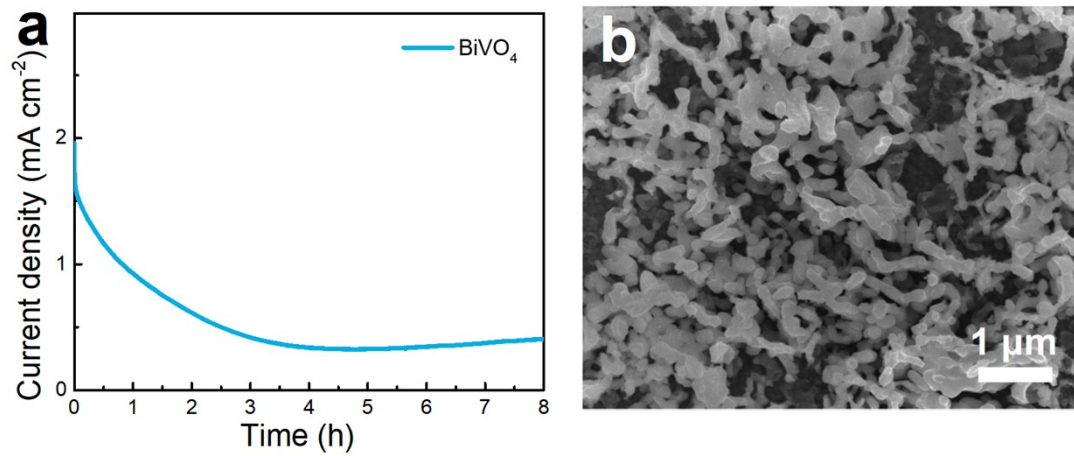

**Fig. S7** (a) PEC stability of bare BiVO<sub>4</sub> photoanode at 1.23 V vs.RHE and (b) SEM image of the BiVO<sub>4</sub> photoanode after stability test.



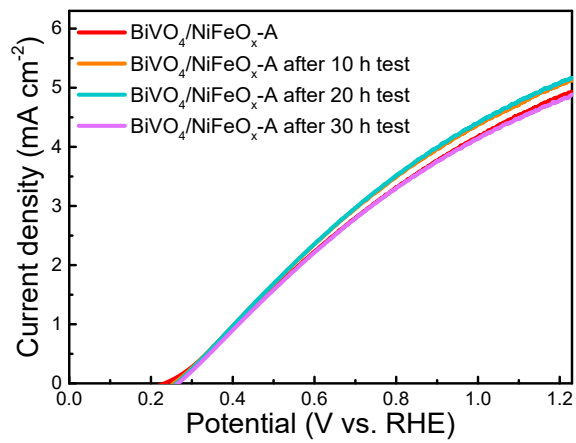

**Fig. S8** LSV curves of BiVO<sub>4</sub>/NiFeO<sub>x</sub>-A photoanode after stability test.

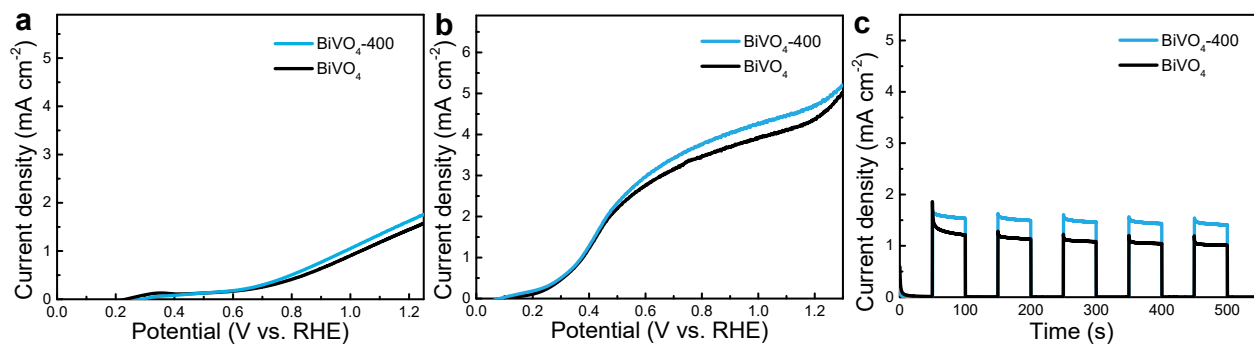

**Fig. S9** (a) LSV curves for water oxidation, (b) LSV curves for sulfite oxidation, and (c) chopped light current-time curves of BiVO<sub>4</sub> and BiVO<sub>4</sub> calcined at 400 °C for 2 h.

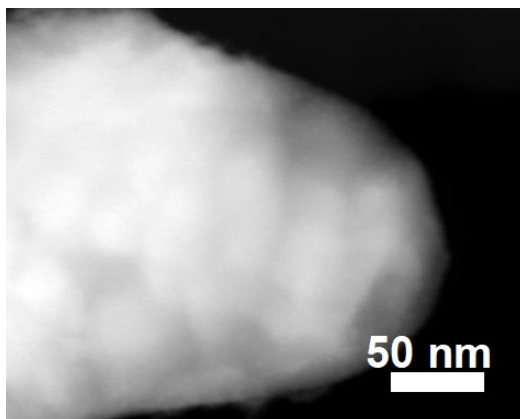

**Fig. S10** HAADF image of the  $\text{BiVO}_4/\text{NiFeO}_x\text{-A}$ .

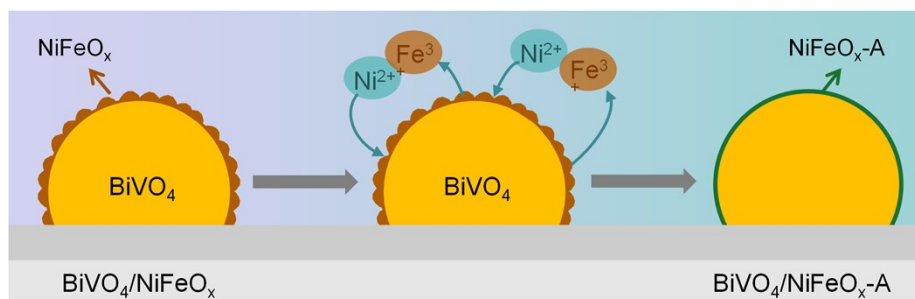

**Fig. S11** Schematic illustration of the surface reconstruction process.

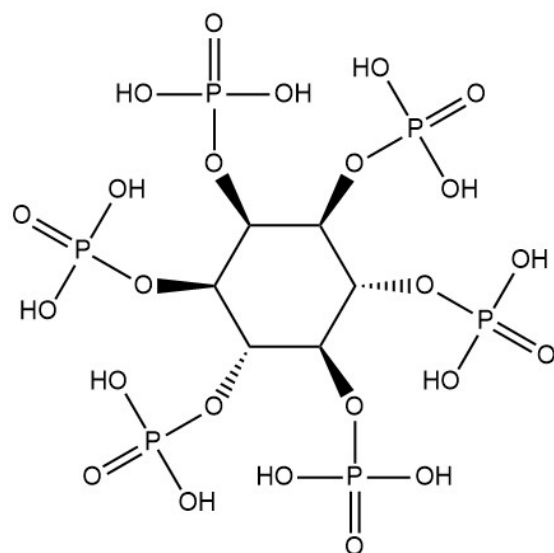

**Fig. S12** The constitutional formula of PA molecule.

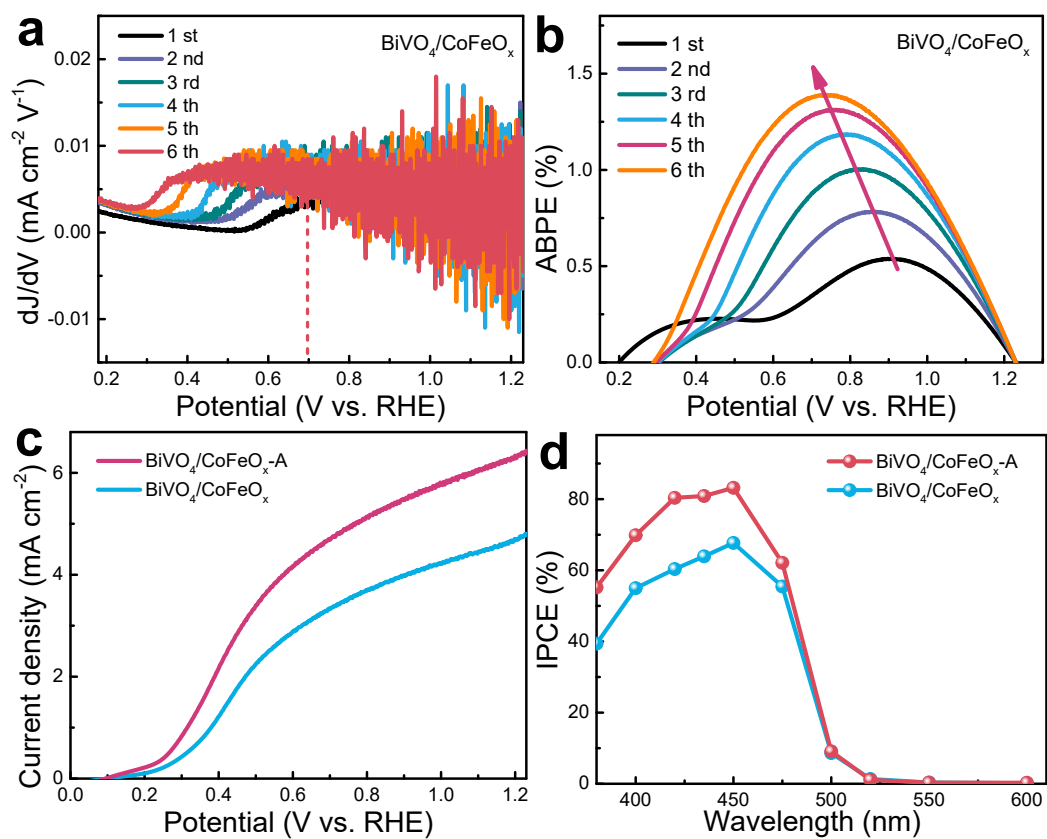

**Fig. S13** (a) The first derivatives of photocurrent densities versus voltages and (b) ABPE plots of BiVO<sub>4</sub>/CoFeO<sub>x</sub> photoanode. (c) LSV curves and (d) (IPCE) plots of BiVO<sub>4</sub>/CoFeO<sub>x</sub> and BiVO<sub>4</sub>/CoFeO<sub>x</sub>-A photoanodes.

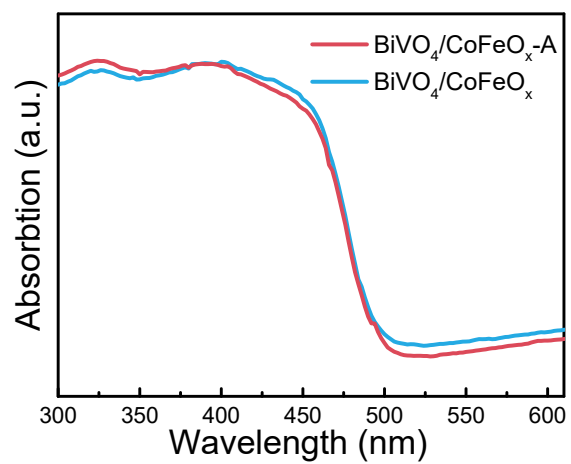

**Fig. S14** UV-vis diffuse reflectance spectra of BiVO<sub>4</sub>/CoFeO<sub>x</sub> and BiVO<sub>4</sub>/CoFeO<sub>x</sub>-A.

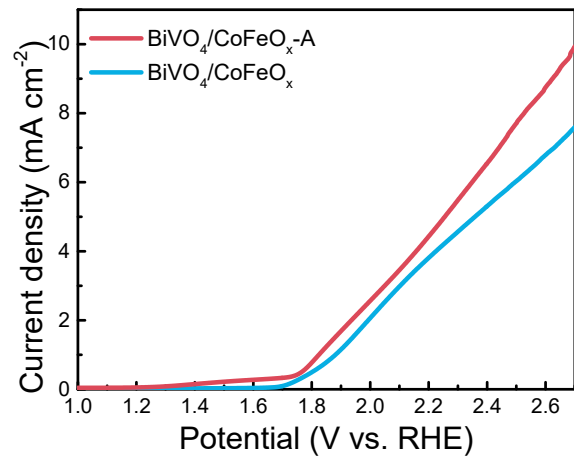

**Fig. S15** LSV curves in dark of BiVO<sub>4</sub>/CoFeO<sub>x</sub> and BiVO<sub>4</sub>/CoFeO<sub>x</sub>-A.



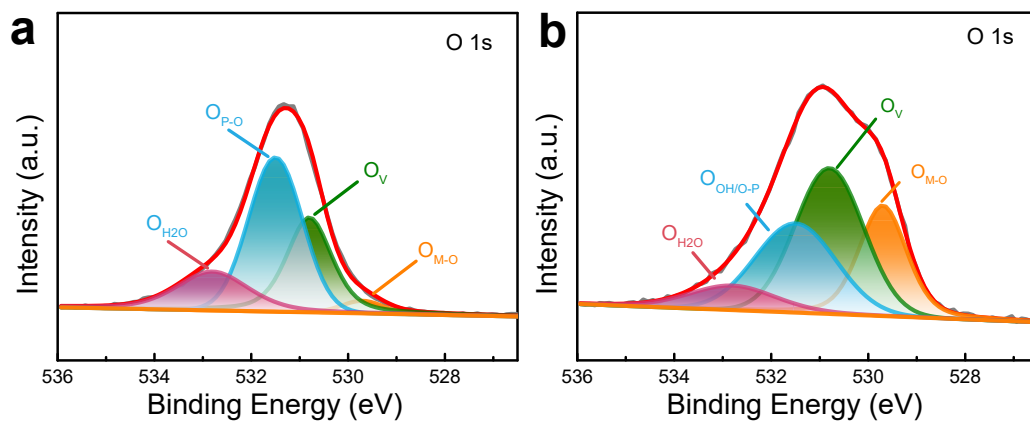

**Fig. S16** O 1s XPS spectra of the (a) BiVO<sub>4</sub>/CoFeO<sub>x</sub> and (b) BiVO<sub>4</sub>/CoFeO<sub>x</sub>-A.

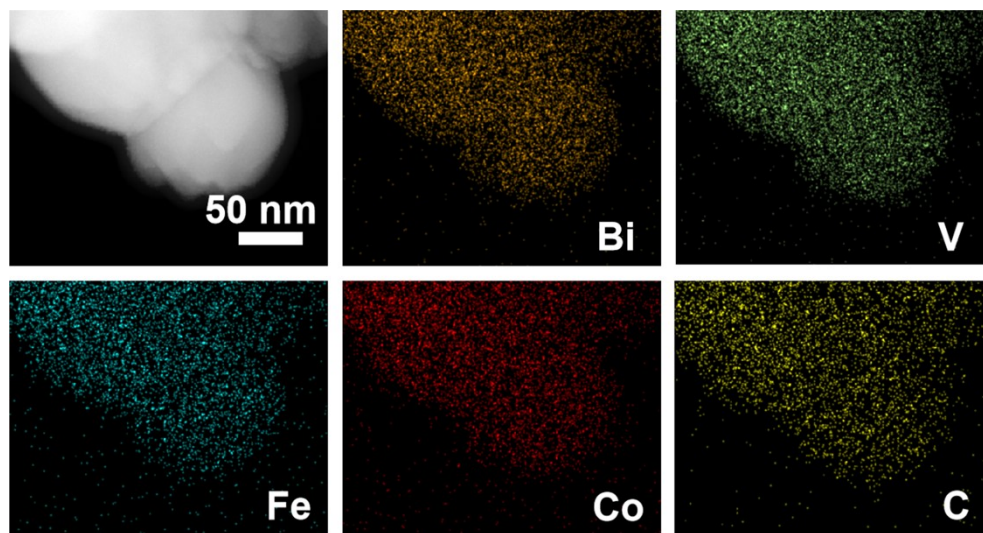

**Fig. S17** HAADF image and corresponding EDX mapping of the  $\text{BiVO}_4/\text{CoFeO}_x\text{-A}$ .

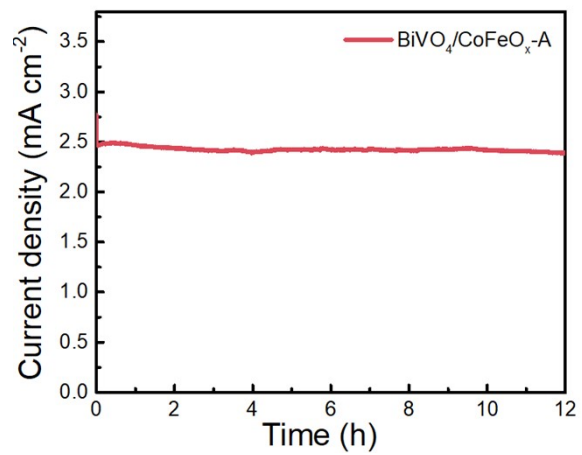

**Fig. S18** Long-term stability test of the BiVO<sub>4</sub>/CoFeO<sub>x</sub>-A at 0.7 V vs.RHE.

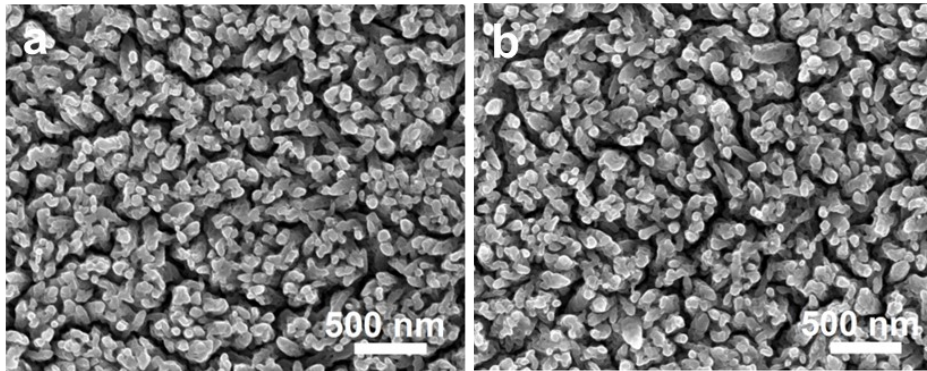

**Fig. S19** SEM image of (a)  $\text{Fe}_2\text{O}_3$  and (b)  $\text{Fe}_2\text{O}_3/\text{NiFeO}_x$  films.

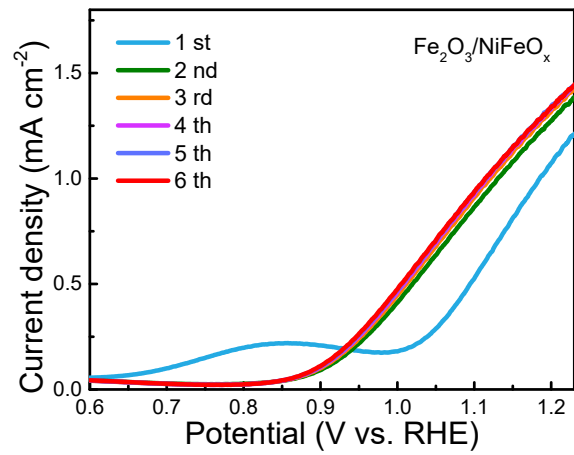

**Fig. S20** Self-adaptive reconstruction of Fe<sub>2</sub>O<sub>3</sub>/NiFeO<sub>x</sub> photoanode.

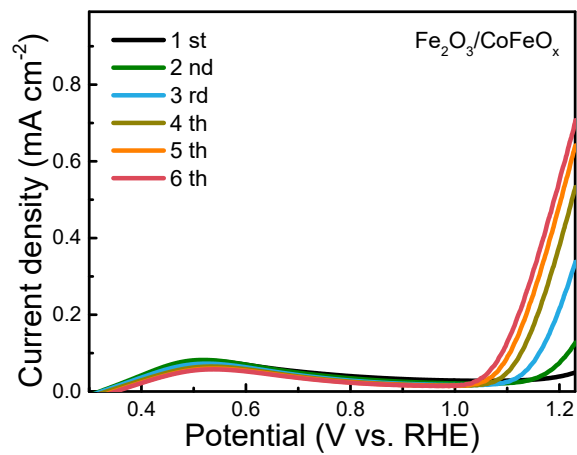

**Fig. S21** Self-adaptive reconstruction of Fe<sub>2</sub>O<sub>3</sub>/CoFeO<sub>x</sub> photoanode.

**Table S1** Comparison of the PEC performance for BiVO<sub>4</sub>/cocatalyst photoanodes.

| Simple                                                   | J (mA cm <sup>-2</sup> )<br>@1.23 V <sub>RHE</sub> | Stability                        | Electrolyte<br>(pH)                   | Ref.             |
|----------------------------------------------------------|----------------------------------------------------|----------------------------------|---------------------------------------|------------------|
| Ov-BiVO <sub>4</sub> @NiFe-MOFs                          | 5.3                                                | 10 h@0.7 V <sub>RHE</sub>        | 1 M KBi + V <sup>5+</sup>             | 1                |
| NiOOH/FeOOH/BiVO <sub>4</sub>                            | 4.7                                                | 500 h@0.6 V <sub>RHE</sub>       | 1 M KBi + V <sup>5+</sup>             | 2                |
| NiFe-OEC/Mo: BiVO <sub>4</sub>                           | 2.6@0.6 V <sub>RHE</sub>                           | 1100 h@0.6 V <sub>RHE</sub>      | 1 M KBi + Fe <sup>2+</sup>            | 3                |
| NiFe-OEC/BVO                                             | 4.0@0.8 V <sub>RHE</sub>                           | 200 h@0.8 V <sub>RHE</sub>       | 1 M KBi + Fe <sup>2+</sup>            | 4                |
| BVO/NiFe-H                                               | 3.65                                               | 2.5 h@1.23 V <sub>RHE</sub>      | 0.5 M Na <sub>2</sub> SO <sub>4</sub> | 5                |
| BiVO <sub>4</sub> /Fe <sub>x</sub> Ni <sub>1-x</sub> OOH | 5.8                                                | 3 h@1.23 V <sub>RHE</sub>        | 0.5 M KBi                             | 6                |
| Urea-NiFeOOH/BiVO <sub>4</sub>                           | 4.85                                               | 40 h@0.7 V <sub>RHE</sub>        | 1 M KBi                               | 7                |
| F-BiVO <sub>4</sub> @NiFe-LDH                            | 3.26                                               | 60 min@1.23 V <sub>RHE</sub>     | 1 M KBi                               | 8                |
| A-CoMoO <sub>4-x</sub> /BVO                              | 3.5                                                | 8 h@1.23 V <sub>RHE</sub>        | 0.5 M Na <sub>2</sub> SO <sub>4</sub> | 9                |
| NiFeY LDH/BiVO <sub>4</sub>                              | 5.2                                                | 25 h@0.8 V <sub>RHE</sub>        | 1 M KBi                               | 10               |
| FeCoO <sub>x</sub> /BiVO <sub>4</sub>                    | 4.82                                               | 10@1.23 V <sub>RHE</sub>         | 1 M KBi                               | 11               |
| NiCo <sub>2</sub> O <sub>4</sub> /Mo: BiVO <sub>4</sub>  | 4.5                                                | 1 h@1.23 V <sub>RHE</sub>        | 1 M KPi                               | 12               |
| β-FeOOH/BiVO <sub>4</sub>                                | 4.3                                                | 2 h@1.23 V <sub>RHE</sub>        | 0.2 M Na <sub>2</sub> SO <sub>4</sub> | 13               |
| BiVO <sub>4</sub> /O <sub>v</sub> /FeO <sub>x</sub>      | 3.13                                               | 2 h@1.23 V <sub>RHE</sub>        | 0.1 M KPi                             | 14               |
| <b>BiVO<sub>4</sub>/NiFeO<sub>x</sub>-A</b>              | <b>5.1</b>                                         | <b>30 h@1.23 V<sub>RHE</sub></b> | <b>0.5 M NaBi</b>                     | <b>This work</b> |

**Table S2** The fitted values of Nyquist plots according to the equivalent circuit in Fig. 3h.

| Samples                                  | $R_s$ ( $\Omega \text{ cm}^{-2}$ ) | $R_{ct}$ ( $\Omega \text{ cm}^{-2}$ ) |
|------------------------------------------|------------------------------------|---------------------------------------|
| BiVO <sub>4</sub>                        | 43.1                               | 3895                                  |
| BiVO <sub>4</sub> /NiFeO <sub>x</sub>    | 44.9                               | 415.9                                 |
| BiVO <sub>4</sub> /NiFeO <sub>x</sub> -A | 43.6                               | 146.5                                 |



## Reference

1. J.-B. Pan, B.-H. Wang, J.-B. Wang, H.-Z. Ding, W. Zhou, X. Liu, J.-R. Zhang, S. Shen, J.-K. Guo, L. Chen, C.-T. Au, L.-L. Jiang and S.-F. Yin, *Angew. Chem. Int. Ed.*, 2020, **59**, 2-10.
2. D. K. Lee and K.-S. Choi, *Nat. Energy*, 2017, **3**, 53-60.
3. Y. Kuang, Q. Jia, G. Ma, T. Hisatomi, T. Minegishi, H. Nishiyama, M. Nakabayashi, N. Shibata, T. Yamada, A. Kudo and K. Domen, *Nat. Energy*, 2017, **2**, 16191.
4. R. T. Gao, D. He, L. Wu, K. Hu, X. Liu, Y. Su and L. Wang, *Angew. Chem. Int. Ed.*, 2020, **59**, 6213-6218.
5. X. Ning, P. Du, Z. Han, J. Chen and X. Lu, *Angew. Chem. Int. Ed.*, 2020, **60**, 3504-3509.
6. B. Zhang, X. Huang, Y. Zhang, G. Lu, L. Chou and Y. Bi, *Angew. Chem. Int. Ed.*, 2020, **59**, 18990-18995.
7. M. Sun, C. Yuan, R.-T. Gao, R. Zhang, X. Liu, T. Nakajima, X. Zhang, Y. Su and L. Wang, *Chem. Eng. J.*, 2021, **426**, 131062.
8. H. Chen, S. Wang, J. Wu, X. Zhang, J. Zhang, M. Lyu, B. Luo, G. Qian and L. Wang, *J. Mater. Chem. A*, 2020, **8**, 13231-13240.
9. S. Ren, M. Sun, X. Guo, X. Liu, X. Zhang and L. Wang, *ACS Catal.*, 2022, **12**, 1686-1696.
10. D. He, R.-T. Gao, S. Liu, M. Sun, X. Liu, K. Hu, Y. Su and L. Wang, *ACS Catal.*, 2020, **10**, 10570-10576.
11. S. Wang, T. He, J.-H. Yun, Y. Hu, M. Xiao, A. Du and L. Wang, *Adv. Funct. Mater.*,

- 2018, **28**, 1802685.
12. C. Feng, Q. Zhou, B. Zheng, X. Cheng, Y. Zhang and Y. Bi, *J. Mater. Chem. A*, 2019, **7**, 22274-22278.
  13. B. Zhang, L. Wang, Y. Zhang, Y. Ding and Y. Bi, *Angew. Chem. Int. Ed.*, 2018, **57**, 2248-2252.
  14. Y. Zhang, J. Bai, J. Wang, S. Chen, H. Zhu, J. Li, L. Li, T. Zhou and B. Zhou, *Chem. Eng. J.*, 2020, **401**, 126134.
